# Supplementary material
Source: PubMed Central journal article supplement (PMC7326485)
Supplement: NIHMS1594598-supplement-Fig_S1.pdf [file NIHMS1594598-supplement-Fig_S1.pdf]

Participant ID:

Date:

**Tolerability, Activity, and Safety Questionnaire**

**Tolerability Profile-**\*Please answer based on the overall experience with transcutaneous spinal direct current stimulation (tsDCS). **0=None** to **10=Severe**.

*General Discomfort (0-10):*

*Pain under sponge (0-10):*

*Burning under sponge (0-10):*

*Itching under sponge (0-10):*

*Other issues:*

*Which stimulation group do you think you were in?*

*Why?*

*Would you recommend this study to a friend?*

Safety Profile: **Please leave this section blank\*** (It will be filled out by the investigator).

Second-degree skin burn:

Falls:

Participant discontinuation:
