# Supplementary material
Source: PubMed Central journal article supplement (PMC7326485)
Supplement: NIHMS1594598-supplement-Fig_S2.pdf [file NIHMS1594598-supplement-Fig_S2.pdf]

| <b>Sham tsDCS+BLT</b>   |                         |             |          |
|-------------------------|-------------------------|-------------|----------|
|                         | <b>Mean Speed (m/s)</b> | <b>SD</b>   | <b>N</b> |
| <b>Baseline</b>         | 1.045238095             | 0.198358742 | 21       |
| <b>Post Training 1</b>  | 1.176190476             | 0.233740801 | 21       |
| <b>D2 Pre Training</b>  | 1.163333333             | 0.232966378 | 21       |
| <b>D2 Post Training</b> | 1.216                   | 0.250650582 | 15       |
| <b>D3 Pre Training</b>  | 1.2                     | 0.259917569 | 15       |
| <b>D3 Post Training</b> | 1.226666667             | 0.271020997 | 15       |
| <b>Day 4 Test</b>       | 1.274666667             | 0.280760871 | 15       |
| <b>Day 30</b>           | 1.255714286             | 0.268061827 | 14       |

| <b>Anodal tsDCS+BLT</b> |                         |             |          |
|-------------------------|-------------------------|-------------|----------|
|                         | <b>Mean Speed (m/s)</b> | <b>SD</b>   | <b>N</b> |
| <b>Baseline</b>         | 1.177272727             | 0.175937809 | 22       |
| <b>Post Training 1</b>  | 1.337272727             | 0.202864764 | 22       |
| <b>D2 Pre Training</b>  | 1.374545455             | 0.189528922 | 22       |
| <b>D2 Post Training</b> | 1.4125                  | 0.203650027 | 16       |
| <b>D3 Pre Training</b>  | 1.4225                  | 0.213088401 | 16       |
| <b>D3 Post Training</b> | 1.431875                | 0.221335906 | 16       |
| <b>Day 4 Test</b>       | 1.470625                | 0.210696266 | 16       |
| <b>Day 30</b>           | 1.51                    | 0.171741777 | 15       |
