# Supplementary material
Source: PubMed Central journal article supplement (PMC7326485)
Supplement: NIHMS1594598-supplement-Fig_S3.pdf [file NIHMS1594598-supplement-Fig_S3.pdf]

| <b>Δ Speed: Δ Step length</b> |                  |                |
|-------------------------------|------------------|----------------|
| <b>Outcome</b>                | <b>Pearson-r</b> | <b>p-value</b> |
| <b>Online 1D</b>              | 0.63162          | <.0001         |
| <b>Offline 1D</b>             | 0.52664          | 0.0003         |
| <b>Total 1D</b>               | 0.55903          | <.0001         |
| <b>Online 4D</b>              | 0.55069          | 0.0013         |
| <b>Offline 4D</b>             | 0.4665           | 0.0082         |
| <b>Total 4D</b>               | 0.45235          | 0.0106         |
| <b>Retention</b>              | 0.2505           | 0.19           |
